# Supplementary material
Source: PubMed Central journal article supplement (PMC3488107)

**SUPPLEMENTAL DATA****Supplemental Table S1. Yeast strains used in this study**

| Strain  | Relevant genotype                                                                                   | Reference                 |
|---------|-----------------------------------------------------------------------------------------------------|---------------------------|
| W303    | <i>MATa/α ade2-1/ade2-1 his3-11,15/his3-11,15 leu2-3,112/leu2-3,112 trp1-1/trp1-1 ura3-1/ura3-1</i> | (1)                       |
| W303-1A | <i>MATa ade2-1 his3-11,15 leu2-3,112 trp1-1 ura3-1</i>                                              | (1)                       |
| W303-1B | <i>MATα ade2-1 his3-11,15 leu2-3,112 trp1-1 ura3-1</i>                                              | (1)                       |
| JDY919  | As W303 but <i>rpl40a::kanMX4/RPL40A</i>                                                            | This study                |
| JDY920  | As W303-1A but <i>rpl40a::kanMX4</i>                                                                | This study                |
| JDY921  | As W303 but <i>rpl40b::kanMX4/RPL40B</i>                                                            | This study                |
| JDY922  | As W303-1A but <i>rpl40b::kanMX4</i>                                                                | This study                |
| JDY923  | As W303-1B but <i>rpl40b::kanMX4</i>                                                                | This study                |
| JDY925  | As W303-1A but <i>rpl40a::kanMX4 rpl40b::kanMX4</i><br>[YCplac33-UB-HA-RPL40A]                      | This study <sup>(a)</sup> |
| JDY711  | As W303-1A but <i>rpl35b::kanMX4</i>                                                                | This study                |
| JDY906  | As JDY925 but <i>NOP58-GFP(S65T)::TRP1</i>                                                          | This study <sup>(b)</sup> |
| JDY907  | As JDY925 but <i>SSF1-GFP(S65T)::natNT2</i>                                                         | This study <sup>(b)</sup> |
| JDY908  | As JDY925 but <i>NSA1-GFP(S65T)::natNT2</i>                                                         | This study <sup>(b)</sup> |
| JDY909  | As JDY925 but <i>NOP7-GFP(S65T)::natNT2</i>                                                         | This study <sup>(b)</sup> |
| JDY910  | As JDY925 but <i>ARX1-GFP(S65T)::natNT2</i>                                                         | This study <sup>(b)</sup> |
| JDY911  | As JDY925 but <i>KRE35-GFP(S65T)::natNT2</i>                                                        | This study <sup>(b)</sup> |
| JDY912  | As JDY925 but <i>RPP0-GFP(S65T)::HIS3MX6</i>                                                        | This study <sup>(b)</sup> |

(a) This strain requires a plasmid-borne *RPL40A* or *RPL40B* allele to support growth. Depending on the experimental conditions and as indicated in the text, this plasmid might be different to YCplac33-UB-HA-RPL40A.

(b) Strains JDY906, JDY907, JDY908, JDY909, JDY910, JDY911 and JDY912 are segregants of the genetic cross between JDY925 and strains YMD24 (gift from M. Dosil), JDY850, JDY854, JDY851, JDY855, JDY853 and JDY861 (gift from M. Remacha), respectively. For details about the genotypes of all latter strains, see (2).

**Supplemental Table S2. Oligonucleotides used in this study**

| <b>Name</b>                               | <b>5'-3' Sequence</b>                                                 |
|-------------------------------------------|-----------------------------------------------------------------------|
| RPL40A-kanUP                              | TATTACCGCTTATTATCCCATAGTTGAGACGACCAAGATTCAAAC<br>CGTACGCTGCAGGTCGAC   |
| RPL40A-kanDOWN                            | AAAGTATACAGTAAATAAATGTATAGATTGATTGGGCGAAACAG<br>AATCGATGAATTCGAGCTCG  |
| RPL40A-UP                                 | CTCATAGCTTCATGGCTCACATGC                                              |
| RPL40A-DOWN                               | ACGTGCTACCGGAGGTAAGAAGTAAAGG                                          |
| RPL40B-kanUP                              | CACTTTTTCCCGTTCAGCAAGAGGTAAAGCCACCAAAGGTTCAA<br>ACGTACGCTGCAGGTCGAC   |
| RPL40B-kanDOWN                            | GTGATGTATACAACTTTGGATTTGTGGAGATCGTAATAAATCG<br>AATCGATGAATTCGAGCTCG   |
| RPL40B-UP                                 | CGGATCCCCTAGTCAGCACAAGAG                                              |
| RPL40B-DOWN                               | CGGATCCGGGCTGCTGTTCTACAAAG                                            |
| GAL-RPL40A-UP                             | GCGTCGACATGCAAATGTATGCACCATATCC                                       |
| GAL-RPL40A-DOWN                           | ACGTGCTACCGGAGGTAAGAAGTAAAGG                                          |
| HA-RPL40A-P1                              | CTCATAGCTTCATGGCTCACATGC                                              |
| HA-RPL40A-P2                              | AGGGGTACCCCGCATAGTCAGGAACATCGTATGGGTATTCAATG<br>ATACCACCTCTC          |
| HA-RPL40A-P3                              | TGACTATGCGGGGTACCCCTATGACGTCCCGGACTATGCAGGAT<br>CCCCATCTTTGAAAGCTTTGG |
| HA-RPL40A-P4                              | ACGTGCTACCGGAGGTAAGAAGTAAAGG                                          |
| RLP24GFP-UP                               | GGAGAACCACCTTTGTCAGG                                                  |
| RLP24GFP-DOWN                             | CGGATCCAAAAGCAATTTTCTTTGTATTTC                                        |
| Probe a (5' A <sub>0</sub> )              | GGTCTCTCTGCTGCCGG                                                     |
| Probe b (18S)                             | CATGGCTTAATCTTTGAGAC                                                  |
| Probe c (3-D/A <sub>2</sub> )             | GACTCTCCATCTCTTGTCTTCTTG                                              |
| Probe d (A <sub>2</sub> /A <sub>3</sub> ) | TGTTACCTCTGGGCC                                                       |
| Probe e (5.8S)                            | TTTCGCTGCGTTCTTCATC                                                   |
| Probe f (E/C <sub>2</sub> )               | GGCCAGCAATTTCAAGTTA                                                   |
| Probe g (C <sub>1</sub> /C <sub>2</sub> ) | GAACATTGTTGCCTAGA                                                     |
| Probe h (25S)                             | CTCCGCTTATTGATATGC                                                    |
| Probe 5S                                  | GGTCACCCACTACACTACTCGG                                                |

**Supplemental Table S3. Plasmids used in this study**

| <b>Name</b>                | <b>Relevant information</b>                                                 | <b>Reference</b> |
|----------------------------|-----------------------------------------------------------------------------|------------------|
| YCplac111                  | CEN, <i>LEU2</i>                                                            | (3)              |
| YCplac111-RPL40A           | CEN, <i>LEU2</i> , Wild-type L40A                                           | This study       |
| YCplac111-RPL40B           | CEN, <i>LEU2</i> , Wild-type L40B                                           | This study       |
| YCplac111-UB-HA-RPL40A     | CEN, <i>LEU2</i> , N-terminal HA-tagged L40A                                | This study       |
| YCplac33-RPL40A            | CEN, <i>URA3</i> , Wild-type L40A                                           | This study       |
| YCplac33-RPL40A            | CEN, <i>URA3</i> , Wild-type L40A                                           | This study       |
| YCplac33-UB-HA-RPL40A      | CEN, <i>URA3</i> , N-terminal HA-tagged L40A                                | This study       |
| pAS24-RPL40A               | CEN, <i>LEU2</i> , <i>GALI-10</i> , N-terminal 2x HA-tagged L40A            | This study       |
| pRS314-RFP-NOP1-RPL25-eGFP | CEN, <i>TRP1</i> , C-terminal RFP-tagged Nop1 and C-terminal GFP-tagged L25 | (4)              |
| pRS314-RFP-NOP1-RPS3-eGFP  | CEN, <i>TRP1</i> , C-terminal RFP-tagged Nop1 and C-terminal GFP-tagged S3  | (4)              |
| pRS316-GAL-NMD3Δ100        | CEN, <i>URA3</i> , <i>GALI</i> , Dominant negative Nmd3Δ100 protein         | (5)              |
| pRS316-MEX67-GFP           | CEN, <i>URA3</i> , GFP-tagged Mex67                                         | (6)              |
| YCplac33-MRT4-eGFP         | CEN, <i>URA3</i> , GFP-tagged Mrt4                                          | (7)              |
| pAJ755                     | CEN, <i>URA3</i> , GFP-tagged Nmd3                                          | (8)              |
| YCplac33-RLP24-eGFP        | CEN, <i>URA3</i> , GFP-tagged Rlp24                                         | This study       |
| pTIF6-GFP                  | CEN, <i>URA3</i> , GFP-tagged Tif6                                          | (9)              |

## SUPPLEMENTAL REFERENCES

1. Thomas, B. J., and Rothstein, R. (1989) Elevated recombination rates in transcriptionally active DNA. *Cell* **56**, 619-630
2. García-Gómez, J. J., Lebaron, S., Froment, C., Monsarrat, B., Henry, Y., and de la Cruz, J. (2011) Dynamics of the putative RNA helicase Spb4 during ribosome assembly in *Saccharomyces cerevisiae*. *Mol Cell Biol* **31**, 4156-4164
3. Gietz, D., St. Jean, A., Woods, R. A., and Schiestl, R. H. (1992) Improved method for high efficiency transformation of intact yeast cells. *Nucleic Acids Res* **20**, 1425
4. Ulbrich, C., Diepholz, M., Bassler, J., Kressler, D., Pertschy, B., Galani, K., Bottcher, B., and Hurt, E. (2009) Mechanochemical removal of ribosome biogenesis factors from nascent 60S ribosomal subunits. *Cell* **138**, 911-922
5. Belk, J. P., He, F., and Jacobson, A. (1999) Overexpression of truncated Nmd3p inhibits protein synthesis in yeast. *RNA* **5**, 1055-1070
6. Segref, A., Sharma, K., Doye, V., Hellwig, A., Huber, J., Luhrmann, R., and Hurt, E. (1997) Mex67p, a novel factor for nuclear mRNA export, binds to both poly(A)<sup>+</sup> RNA and nuclear pores. *EMBO J* **16**, 3256-3271
7. Rodríguez-Mateos, M., García-Gómez, J. J., Francisco-Velilla, R., Remacha, M., de la Cruz, J., and Ballesta, J. P. G. (2009) Role and dynamics of the ribosomal protein P0 and its related *trans*-acting factor Mrt4 during ribosome assembly in *Saccharomyces cerevisiae*. *Nucleic Acids Res* **37**, 7519-7532
8. Hedges, J., West, M., and Johnson, A. W. (2005) Release of the export adapter, Nmd3p, from the 60S ribosomal subunit requires Rpl10p and the cytoplasmic GTPase Lsg1p. *EMBO J* **24**, 567-579
9. Menne, T. F., Goyenechea, B., Sanchez-Puig, N., Wong, C. C., Tonkin, L. M., Ancliff, P. J., Brost, R. L., Costanzo, M., Boone, C., and Warren, A. J. (2007) The Shwachman-Bodian-Diamond syndrome protein mediates translational activation of ribosomes in yeast. *Nature Genet* **39**, 486-495
10. Kos, M., and Tollervey, D. (2010) Yeast pre-rRNA processing and modification occur cotranscriptionally. *Mol Cell* **37**, 809-820
11. Henras, A. K., Soudet, J., Gerus, M., Lebaron, S., Caizergues-Ferrer, M., Mougin, A., and Henry, Y. (2008) The post-transcriptional steps of eukaryotic ribosome biogenesis. *Cell Mol Life Sci* **65**, 2334-2359
12. Fromont-Racine, M., Senger, B., Saveanu, C., and Fasiolo, F. (2003) Ribosome assembly in eukaryotes. *Gene* **313**, 17-42
13. Venema, J., and Tollervey, D. (1999) Ribosome synthesis in *Saccharomyces cerevisiae*. *Annu Rev Genet* **33**, 261-311
14. Kressler, D., Hurt, E., and Bassler, J. (2010) Driving ribosome assembly. *Biochim Biophys Acta* **1803**, 673-683
15. Kressler, D., Linder, P., and de la Cruz, J. (1999) Protein *trans*-acting factors involved in ribosome biogenesis in *Saccharomyces cerevisiae*. *Mol Cell Biol* **19**, 7897-7912

## SUPPLEMENTAL FIGURE LEGENDS

**SUPPLEMENTAL FIGURE S1.** Yeast pre-rRNA processing pathway. (A) Structure and processing sites of the 35S pre-rRNA. This precursor contains the sequences for the mature 18S, 5.8S and 25S rRNAs that are separated by two internal transcribed spacer sequences, ITS1 and ITS2, and flanked by two external transcribed spacer sequences, 5' ETS and 3' ETS. The mature rRNA species are shown as bars and the spacers as lines. The processing sites and the location of various probes used in this study are indicated. Probes are listed in Table S3. (B) Pre-rRNA processing pathway. Cleavage and trimming reactions are indicated. Note that pre-rRNA processing also occurs co-transcriptionally at site A<sub>2</sub> (10) (not shown). For further description of the yeast pre-rRNA processing pathway, see (11-13).

**SUPPLEMENTAL FIGURE S2.** Model depicting the temporal assembly position of r-protein L40. The major intermediates of pre-ribosomal particles along the pathway of 60S ribosomal subunit maturation and their predominant pre-rRNA content are shown. These particles are termed, according to their position in the pathway, early 0 (E<sub>0</sub>), early 1 (E<sub>1</sub>), early 2 (E<sub>2</sub>) and middle (M) 66S pre-ribosomal particles and late (L) and cytoplasmic (pre-60S) pre-60S r-particles. 90S and 43S pre-ribosomal particles are also indicated. The existence of these particles is inferred from the RNA and protein composition of purified complexes associated with selected ribosomal assembly factors. The relative abundance in the different pre-ribosomal particles of the assembly factors used as baits in Fig. 8 is shown. Herein, we propose that L40 binds to cytoplasmic pre-60S ribosomal particles; the assembly position of L1 and L3 is also shown. Note that assembly of L40 is required for the release of both Nmd3 and Rlp24 from cytoplasmic pre-60S ribosomal particles. Nucleolus, grey rectangle; pre-ribosomal particles and mature r-subunits, ovals; nuclear envelope, rods; L1, L3 and L40, blue are drawn as green and red structures, respectively. For further description of the ribosome assembly pathway, see (11,12,14,15).

**SUPPLEMENTAL FIGURE S3.** Complementation of the *rpl40a* and *rpl40b* null mutants by plasmid-borne *RPL40A* and *RPL40B*. Strains W303-1A (*Wild-type*), JDY920 (*rpl40a*Δ) and JDY922 (*rpl40b*Δ) were transformed with an empty YCplac111 plasmid, YCplac111-RPL40A or YCplac111-RPL40B. Transformants were grown in SD-Leu and diluted to an OD<sub>600</sub> of 0.05. Cells were spotted in 10-fold serial dilutions onto SD-Leu plates and incubated at 30 °C for 3 days. The doubling times in liquid SD-Leu are indicated in minutes. Values correspond to the mean and the standard deviation of five independent experiments.

**SUPPLEMENTAL FIGURE S4.** Polysome analysis of the complemented *rpl40a* and *rpl40b* null mutants. Strains JDY920 (*rpl40a*Δ) and JDY922 (*rpl40b*Δ), transformed with YCplac111-RPL40A or YCplac111-RPL40B (see Fig. S3), were grown in SD-Leu medium at 30 °C to an OD<sub>600</sub> of around 0.8. Whole cell extracts were prepared and 10 A<sub>260</sub> of each extract were resolved in 7-50% sucrose

gradients. The  $A_{254}$  was continuously measured. Sedimentation is from left to right. The peaks of free 40S and 60S ribosomal subunits, 80S free couples/monosomes and polysomes are indicated.

**SUPPLEMENTAL FIGURE S5.** The HA-L40A fusion protein is partially functional. (A) W303-1A (*Wild-type*) and the *rpl40* null strain JDY925, transformed with either with YCplac111-RPL40A (*RPL40A*) or YCplac111-UB-HA-RPL40A (*HA-RPL40A*), were grown in liquid YPD medium. Ten-fold serial dilutions were spotted on YPD plates and incubated at 30 °C for 3 days. The doubling times in liquid YPD are indicated in minutes. Values correspond to the mean and the standard deviation of five independent experiments. (B) Polysome profile analysis of cell extracts of the *rpl40* null strain transformed with plasmid YCplac111-UB-HA-RPL40A. For details, see legend to Fig. 1B. The peaks of free 40S and 60S ribosomal subunits, 80S free couples/monosomes and polysomes are indicated. (C) Fractions were collected from the above-shown gradient, then proteins were extracted from each fraction, and equal volumes were subjected to western blotting with antibodies against the HA tag or the ribosomal protein L35.

**SUPPLEMENTAL FIGURE S6.** Nmd3 and Rlp24 are not properly recycled back to the nucleus upon depletion of L40. *GAL::RPL40* cells expressing GFP-tagged versions of either Nmd3 or Rlp24 were grown at 30 °C in SGal-Leu-Ura (Gal) and shifted for 18 h to SD-Leu-Ura (18 h Glc). Then, the subcellular localization of these GFP-tagged proteins was examined by fluorescence microscopy. DAPI was used to visualize the nucleoplasm. Arrows point to the nuclear fluorescence of the GFP-tagged proteins.

**SUPPLEMENTAL FIGURE S7.** Nmd3 and Rlp24 are retained on cytoplasmic 60S ribosomal particles upon depletion of L40. *GAL::RPL40* cells expressing GFP-tagged versions of either Nmd3 or Rlp24 were grown at 30 °C in SGal-Leu-Ura (Gal) and shifted for 18 h to SD-Leu-Ura (18 h Glc). Cell extracts were prepared and 10  $A_{260}$  of each extract were resolved in 7-50% sucrose gradients. Fractions were collected, then proteins were extracted from each fraction, and equal volumes were subjected to western blotting using anti-GFP antibodies to examine the position of Nmd3- or Rlp24-GFP. Antibodies against L1 ribosomal protein were used to monitor the position of 60S ribosomal subunits and polysomes. The peaks of free 40S and 60S ribosomal subunits, 80S and polysomes are indicated.

**SUPPLEMENTAL FIGURE S8.** Analysis of ribosomes from cells expressing the HA-L40A. Ribosomal particles (100  $\mu$ g) from W303-1A (*Wild-type*) and JDY925 [YCplac111-UB-HA-RPL40A] (*HA-RPL40A*) cells were prepared (lanes -) and further purified by a 0.5 M  $\text{NH}_4\text{Cl}$  wash (lanes 0.5M) as described in "Experimental Procedures". Proteins were resolved by SDS-PAGE and analysed by Coomassie staining. Selected ribosomal proteins were detected by western blotting using specific antibodies against the HA-tag and the ribosomal proteins L1, L3, L5, L10, L12, L35 and P0.

FIGURE S1

**A**

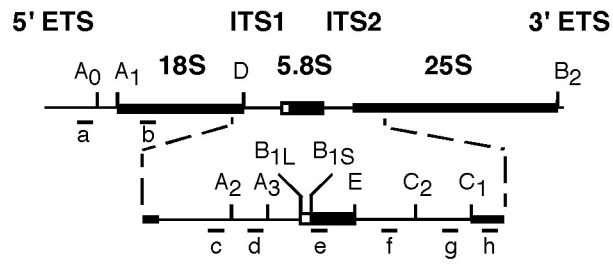

**B**

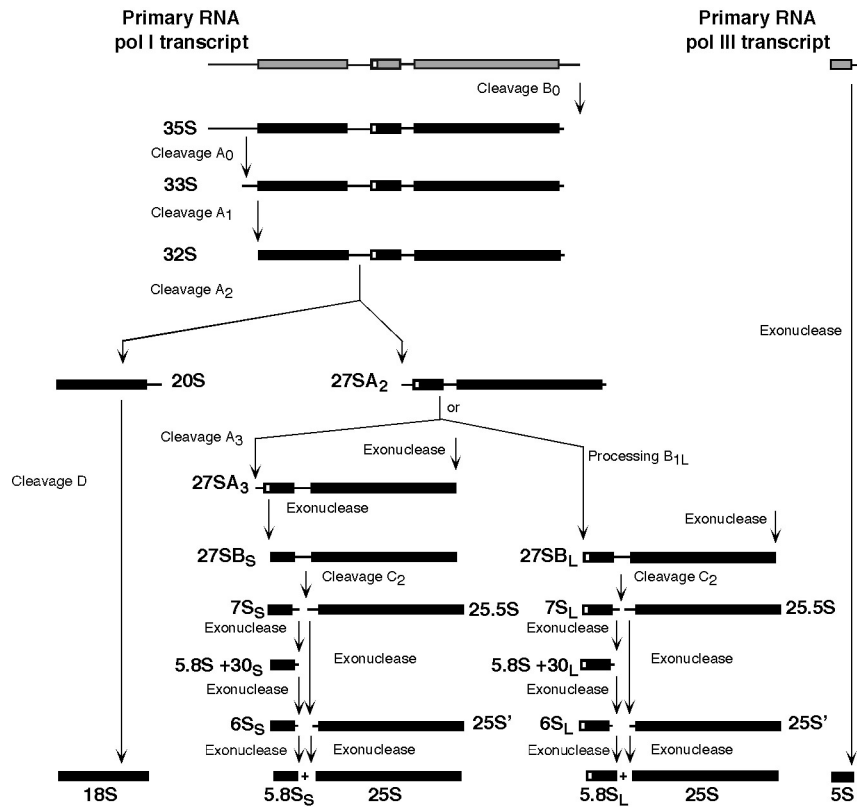

FIGURE S2

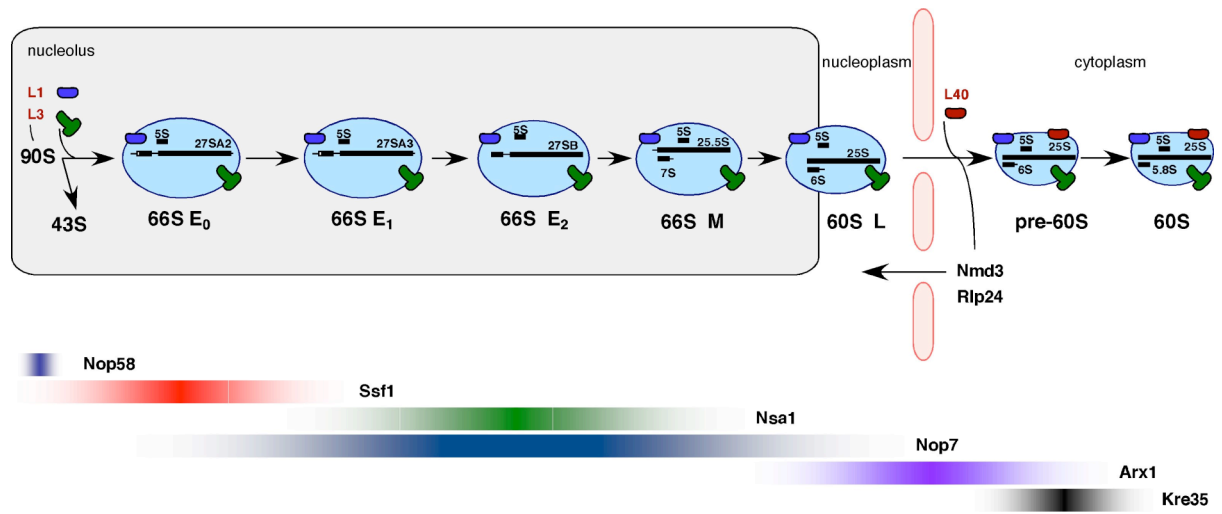



FIGURE S3

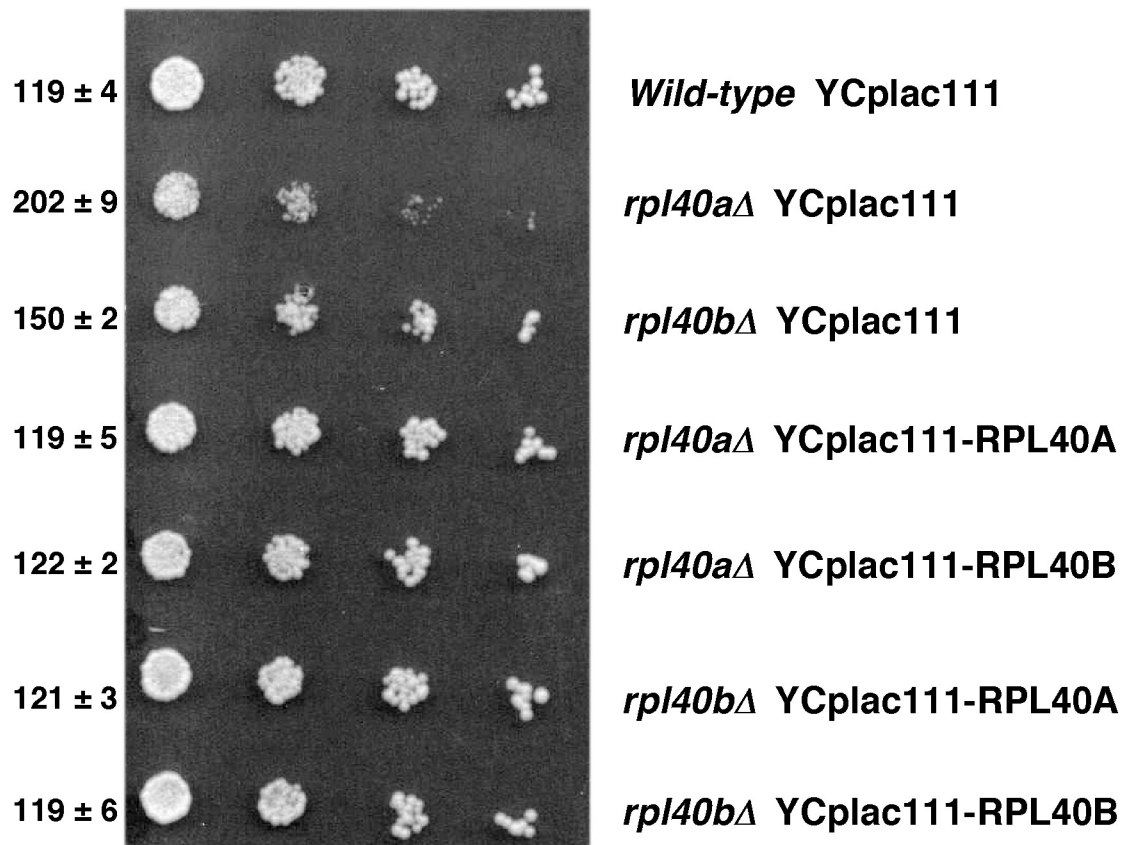

FIGURE S4

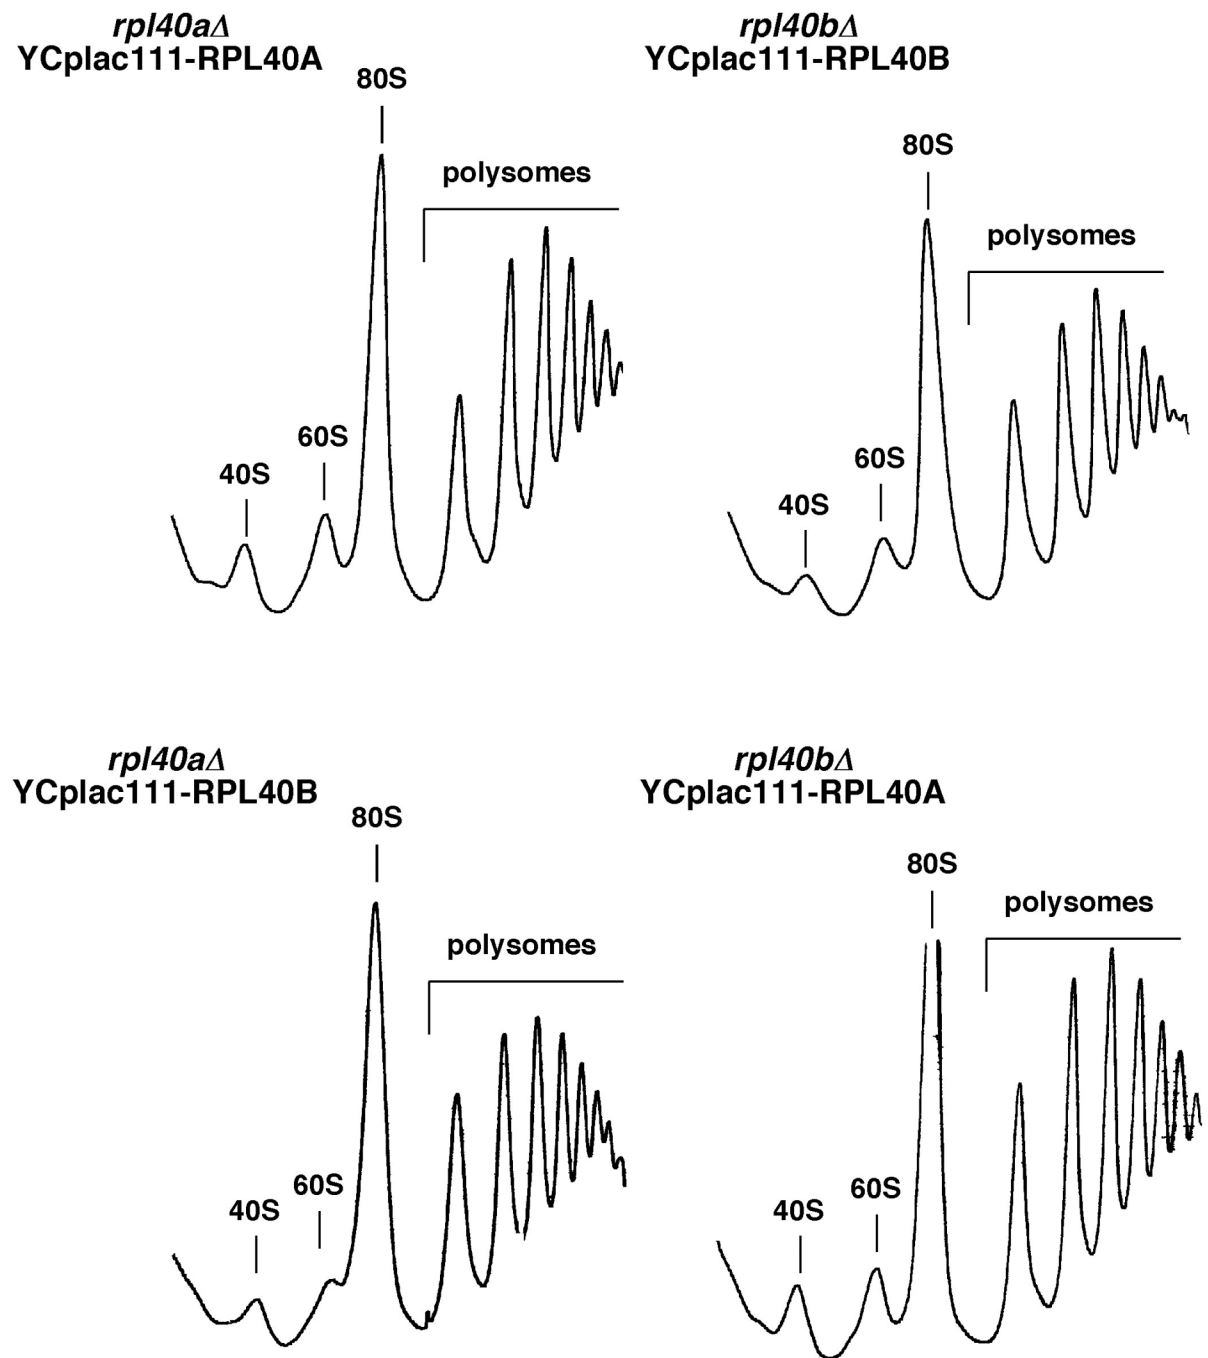

FIGURE S5

**A**

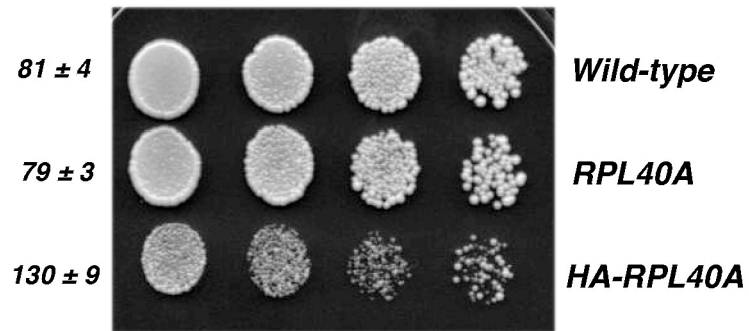

**B**

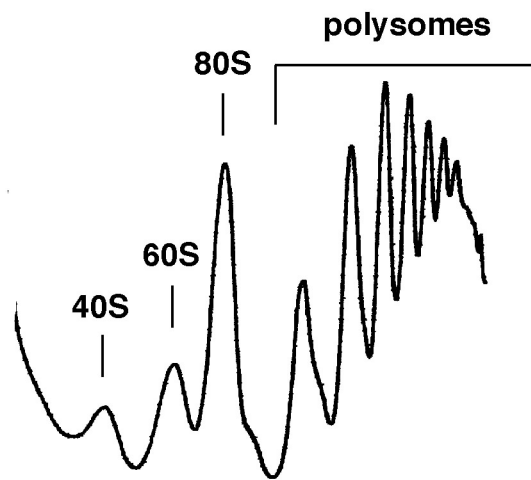

**C**

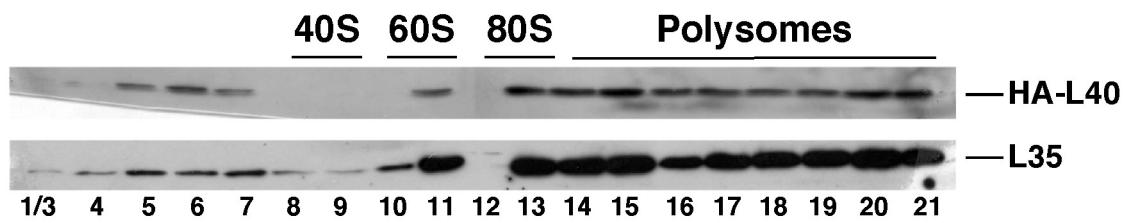

**FIGURE S6**

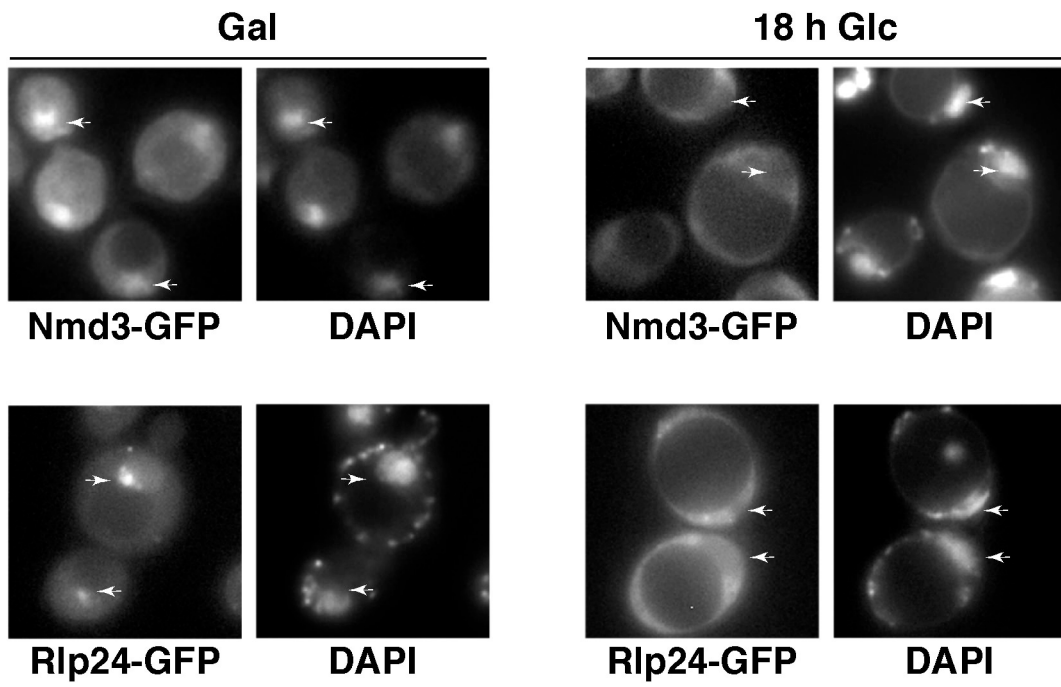

FIGURE S7

***GAL::RPL40***

**Gal**

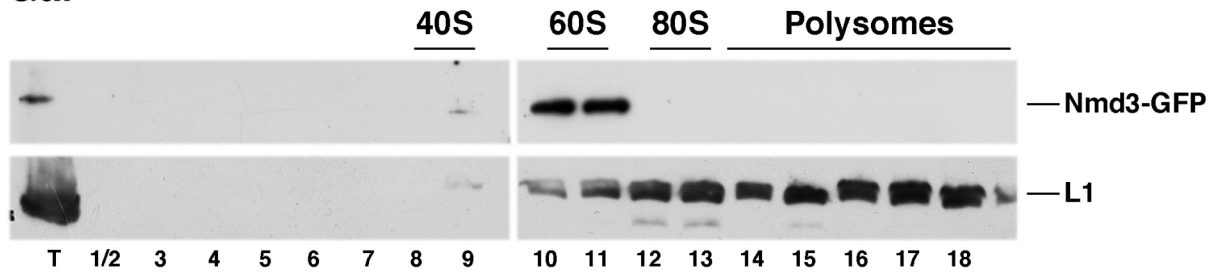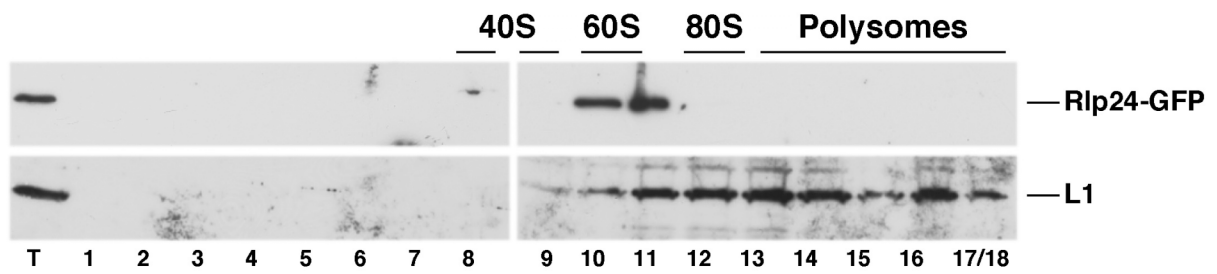

***GAL::RPL40***

**18 h Glc**

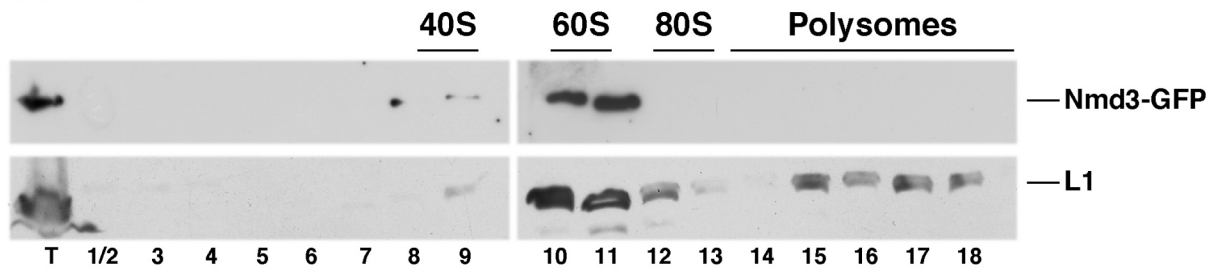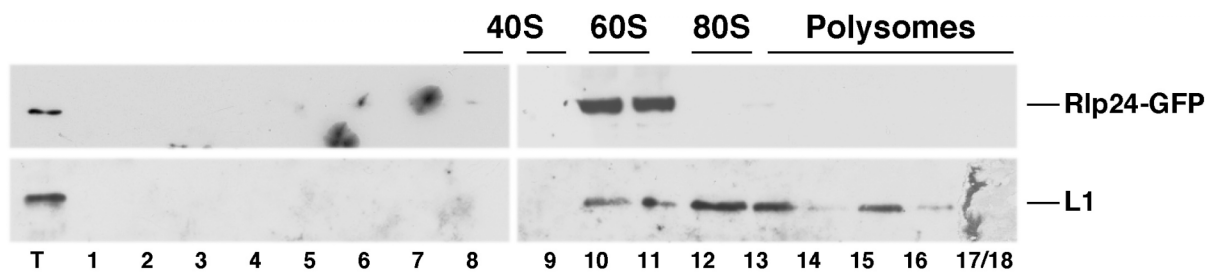

FIGURE S8

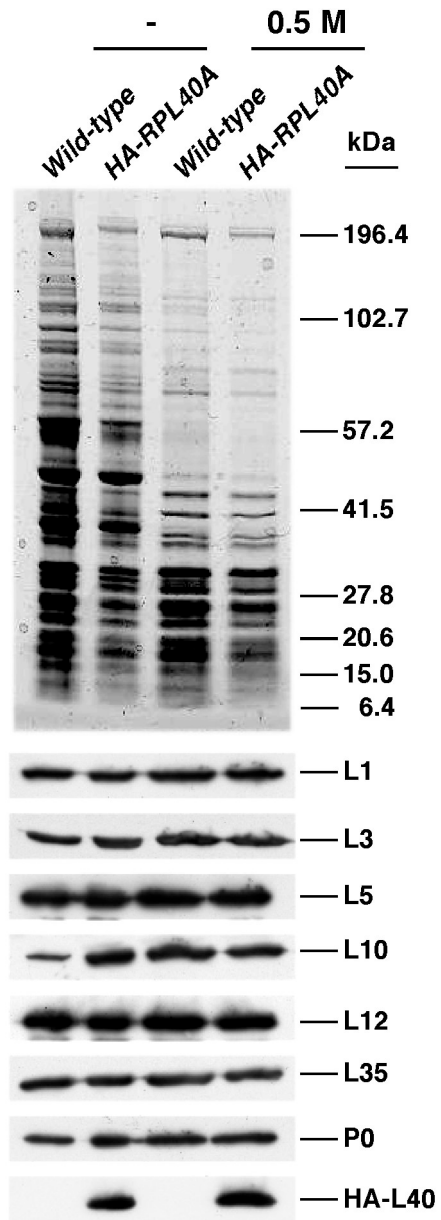

Supplement: supp_M112.400564_jbc.M112.400564-1.pdf [file supp_M112.400564_jbc.M112.400564-1.pdf]
